# Supplementary material
Source: PubMed Central journal article supplement (PMC2154452)
Supplement: supp_0708102104_08102Table1.pdf [file supp_0708102104_08102Table1.pdf]

**Table 1. Strains and plasmids used in this study.**

| Strain              | Genotype                                                                                     | Source     |
|---------------------|----------------------------------------------------------------------------------------------|------------|
| CV104               | $\Delta lacX74 mal::lacI^q \Delta sgrS::kan$                                                 | (1)        |
| CV105               | $\Delta lacX74 mal::lacI^q \Delta sgrS::kan \Delta ptsG::cat$                                | (2)        |
| BH300               | <i>sgrT</i> '-' <i>lacZY</i> translational fusion                                            | This Study |
| BH301               | $\Delta lacX74 sgrT_{UAA}$ '-' <i>lacZY</i> translational fusion                             | This Study |
| BH302               | $\Delta lacX74 \Delta sgrR::cat sgrT$ '-' <i>lacZY</i> translational fusion                  | This Study |
| CS136               | $\Delta sgrS::kan$                                                                           | This Study |
| Plasmid             | Genotype                                                                                     | Source     |
| pHDB3               | pBR322 derivative, vector control                                                            | (3)        |
| pLCV1               | pHDB3 with 0.25 kb <i>sgrS</i> coding sequence under control of the $P_{LacO}$ promoter      | (1)        |
| pLCV5               | pLCV1 with a point mutation that changes the fifth codon of <i>sgrT</i> to UAA               | This Study |
| pBRP <sub>lac</sub> | Cloning plasmid with $P_{lac}$ promoter                                                      | (4)        |
| pBRCV7              | pBRP <sub>lac</sub> with <i>sgrT</i> coding sequence under control of the $P_{lac}$ promoter | This Study |
| pBRCV8              | pBRCV7 with a point mutation that changes the fifth codon of <i>sgrT</i> to UAA              | This Study |
| pBRCS1              | pBRCV7 with a 3xFLAG tag inserted at the C-terminus of SgrT                                  | This Study |
| pBRCS4              | pBRCV8 with a 3xFLAG tag inserted at the C-terminus of SgrT                                  | This Study |
| pLCS1               | pLCV1 with <i>sgrT</i> AUG start codon mutated to UAA                                        | This Study |

pBRCS7 pBRCV7 with *sgrT* AUG start codon mutated to UAA

This Study

(*sgrT*<sub>UAA2</sub>)

#### References

1. Vanderpool, C. K. & Gottesman, S. (2004) *Mol Microbiol* **54**, 1076-89.
2. Vanderpool, C. K. & Gottesman, S. (2007) *J Bacteriol* **189**, 2238-48.
3. Ulbrandt, N. D., Newitt, J. A. & Bernstein, H. D. (1997) *Cell* **88**, 187-196.
4. Guillier, M. & Gottesman, S. (2006) *Mol Microbiol* **59**, 231-47.
