# Supplementary material
Source: PubMed Central journal article supplement (PMC2154452)
Supplement: supp_0708102104_08102Table2.pdf [file supp_0708102104_08102Table2.pdf]

**Table 2. Oligonucleotides used in this study.**

| Oligo   | Sequence                                                                                          |
|---------|---------------------------------------------------------------------------------------------------|
| O-CV111 | 5'-CCCCATGCGTCAGTTTTAACAGCACTATTTTACCGCGACAGCGAAG-3'                                              |
| O-CV112 | 5'-CTTCGCTGTCGCGGTAAAATAGTGCTGTTAAAAGTACGCATGGGGC-3'                                              |
| O-CV115 | 5'-CCCGACGTCTAGCGGATAACAATTCACACATAATTCATTAAAGAGG<br>AGAAATTAAGTATGCGTCAGTTTTATCAGCACTATTTTACC-3' |
| O-CV116 | 5'-CCCGAATTCCAGGCAAGTCAACTTTCAGAATTGCG-3'                                                         |
| O-CV118 | 5'-TAACTATGCGTCAGTTTTAACAGCACTATTTTACCGCGACAGCGAAG-3'                                             |
| O-CV119 | 5'-CTTCGCTGTCGCGGTAAAATAGTGCTGTTAAAAGTACGCATAGTTA-3'                                              |
| O-CV207 | 5'-AAAGATCATGATATCGATTACAAGGATGACGATGACAAGTACTTGCC<br>TGGAATTCTCATGTTTGACAGC-3'                   |
| O-CV208 | 5'-ATGATCTTTATAATCACCGTCATGGTCTTTGTAGTCACTTTCAGAATT<br>GCGGTCATCCCACTGCATCAG-3'                   |
| O-CV240 | 5'-CATTAAAGAGGAGAAATTAAGTAAACGTCAGTTTTATCAGCAC-3'                                                 |
| O-CV241 | 5'-GTGCTGATAAAAAGTACGTTAAGTTAATTTCTCCTCTTTAATG-3'                                                 |
| O-CV247 | 5'-CATGCTTGAAGGACTGATGCAGTGGGATGACCGCAATTCTATTCCGGG<br>GATCCGTCGACC-3'                            |
| O-CV248 | 5'-TTACACCAATACTCAGTCACACATGATGCAGGCAAGTCAAGTGTAGGCT<br>GGAGCTGCTTC-3'                            |
