# Supplementary material
Source: PubMed Central journal article supplement (PMC2154452)

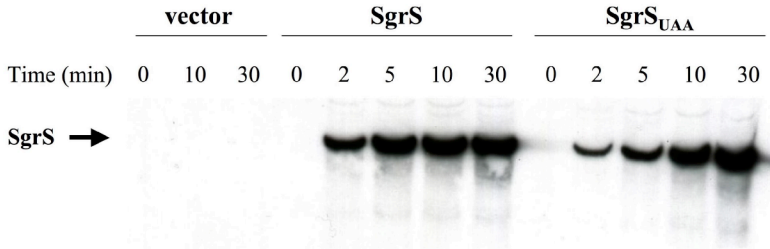

Supplement: supp_0708102104_08102Fig10.pdf [file supp_0708102104_08102Fig10.pdf]

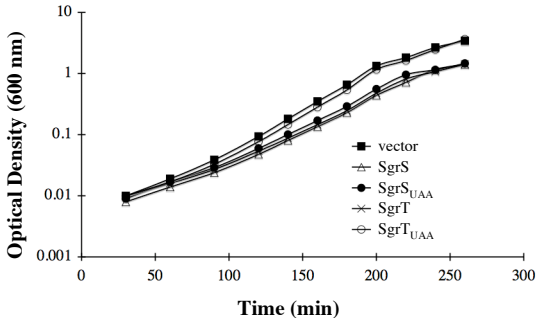

Supplement: supp_0708102104_08102Fig11.pdf [file supp_0708102104_08102Fig11.pdf]

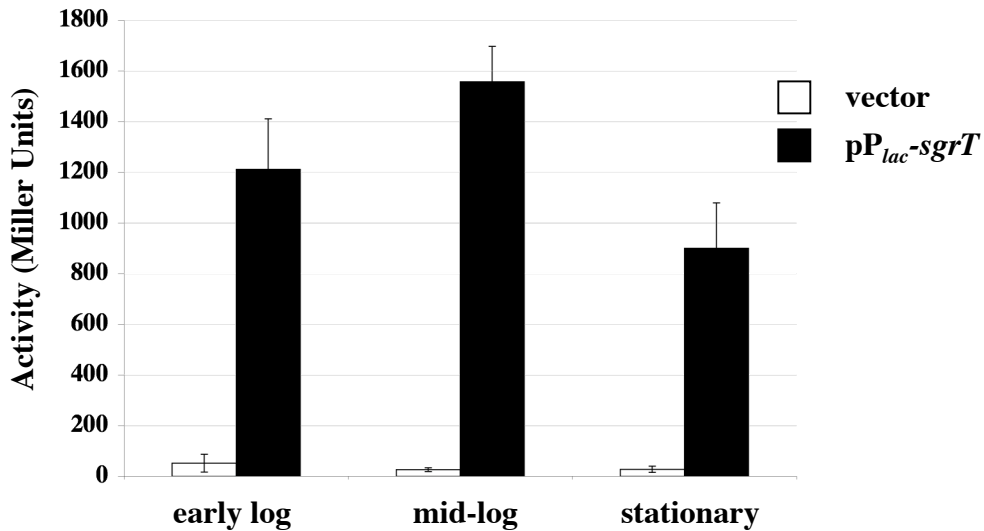

Supplement: supp_0708102104_08102Fig12.pdf [file supp_0708102104_08102Fig12.pdf]

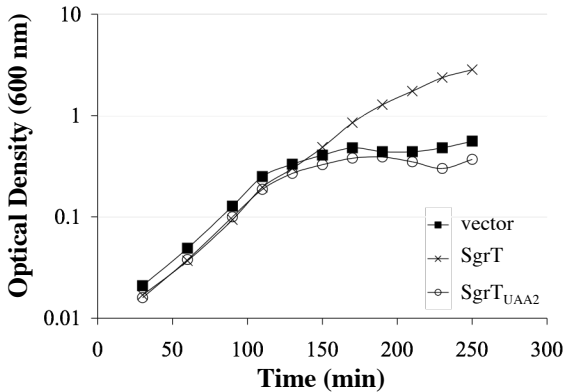

Supplement: supp_0708102104_08102Fig7.pdf [file supp_0708102104_08102Fig7.pdf]

vector SgrT

A.

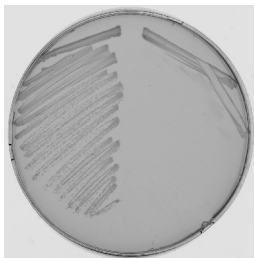

glucose

B.

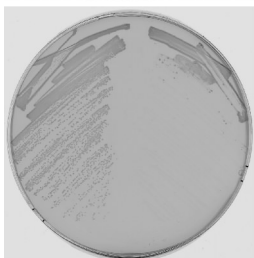

NAG

C.

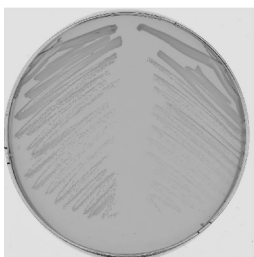

mannose

D.

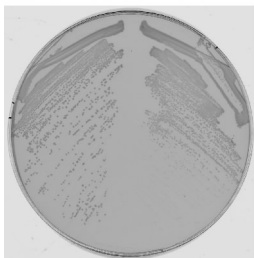

fructose

E.

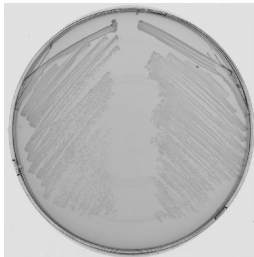

mannitol

F.

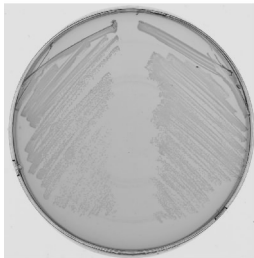

CAA

Supplement: supp_0708102104_08102Fig8.pdf [file supp_0708102104_08102Fig8.pdf]

**$P_{lac}$ -sgrTFLAG**

**$P_{lac}$ -sgrT<sub>UAA</sub>FLAG**

**Time (min)**

0 2 5 10 30

0 2 5 10 30

**SgrT-FLAG** →

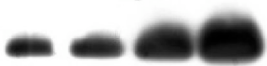

Supplement: supp_0708102104_08102Fig9.pdf [file supp_0708102104_08102Fig9.pdf]
